# Supplementary material for: Randomized controlled trial of medium cut-off versus high-flux dialyzers on quality of life outcomes in maintenance hemodialysis patients
Source: PubMed Central journal article supplement (PMC7210312; doi:10.1038/s41598-020-64622-z), 2020-05-08
Supplement: 41598_2020_64622_MOESM1_ESM.pdf [file 41598_2020_64622_MOESM1_ESM.pdf]

**Randomized controlled trial of medium cut-off versus high-flux dialyzers on quality of life outcomes in maintenance hemodialysis patients**

Jeong-Hoon Lim<sup>1</sup>, Yeongwoo Park<sup>2</sup>, Ju-Min Yook<sup>1</sup>, Soon-Youn Choi<sup>1</sup>, Hee-Yeon Jung<sup>1</sup>, Ji-Young Choi<sup>1</sup>, Sun-Hee Park<sup>1</sup>, Chan-Duck Kim<sup>1</sup>, Yong-Lim Kim<sup>1</sup> and Jang-Hee Cho<sup>1</sup> \*

<sup>1</sup>Department of Internal Medicine, School of Medicine, Kyungpook National University, Kyungpook National University Hospital, Daegu, South Korea. <sup>2</sup>Department of Statistics, Kyungpook National University, Daegu, South Korea

Supplementary Information Listing:

Supplementary Table S1

\*Corresponding author:

Jang-Hee Cho, MD, PhD

Associate Professor

Division of Nephrology, Department of Internal Medicine

Kyungpook National University Hospital, 130 Dongdeok-ro, Jung-gu, Daegu, 41944, Korea

Tel: +82-53-200-5550

Fax: +82-53-426-2046

E-mail: [jh-cho@knu.ac.k](mailto:jh-cho@knu.ac.k)

**Supplementary Table S1. Characteristics of dialyzers**

| Dialyzer      | Membrane polymer                          | Membrane type  | Inner diameter (µm) | Wall thickness (µm) | Effective surface area (m <sup>2</sup> ) | Ultrafiltration coefficient (mL/h/mmHg) | Priming volume (mL) | Sterilization |
|---------------|-------------------------------------------|----------------|---------------------|---------------------|------------------------------------------|-----------------------------------------|---------------------|---------------|
| Therenova 400 | Polyarylethersulfone-polyvinylpyrrolidone | Medium cut-off | 180                 | 35                  | 1.7                                      | 48                                      | 91                  | Steam         |
| FX CorDiax 80 | Polysulfone-polyvinylpyrrolidone          | High-flux      | 185                 | 35                  | 1.8                                      | 64                                      | 95                  | Steam         |
| FX CorDiax 60 | Polysulfone-polyvinylpyrrolidone          | High-flux      | 185                 | 35                  | 1.4                                      | 47                                      | 74                  | Steam         |
